# Supplementary material for: Tuning Coupled Toroidic and Polar Orders in a Bilayer Antiferromagnet
Source: Research Square preprint supplement (doi:10.21203/rs.3.rs-7811382/v1), 2025-10-24
Supplement: Supplementary file 1 [file 2343d0fa9625792fc1048b7e.pdf]

# Tuning Coupled Toroidic and Polar Orders in a Bilayer Antiferromagnet

Chuangtang Wang<sup>1,+</sup>, Xiaoyu Guo<sup>1,+</sup>, Zixin Zhai<sup>2</sup>, Meixin Cheng<sup>3,4</sup>, Sang-Wook Cheong<sup>5</sup>, Adam W. Tsen<sup>3,4</sup>, Bing Lv<sup>2</sup>, and Liuyan Zhao<sup>1,\*</sup>

<sup>1</sup> Department of Physics, University of Michigan, Ann Arbor, USA

<sup>2</sup> Department of Physics, the University of Texas at Dallas, Richardson, TX, USA

<sup>3</sup> Department of Chemistry, University of Waterloo, Waterloo, ON, Canada

<sup>4</sup> Institute for Quantum Computing, University of Waterloo, Waterloo, ON, Canada

<sup>5</sup> Rutgers Center for Emergent Materials, Rutgers University, Piscataway, NJ, USA

<sup>+</sup> These authors contribute equally.

<sup>\*</sup> Corresponding author email: [lyzhao@umich.edu](mailto:lyzhao@umich.edu) (L.Z.)

**Note 1: Magnetoelectric susceptibility tensor**

Starting from the constitutive relation:  $P_i = \vec{\alpha}_{ij}H_j$ , where  $P_i$  is the polarization (polar),  $H_j$  is the magnetic field (axial), and  $\vec{\alpha}_{ij}$  is an axial tensor. Under a spatial symmetry operation  $R$ ,  $\vec{\alpha}_{ij}$  must satisfy Neumann's principle:

$$\vec{\alpha}_{ij} = (\det R) R_{ik} R_{jl} \vec{\alpha}_{kl}$$

While under a spatial symmetry combined time-reversal symmetry  $T$  (primed),  $R' = TR$ ,

$$\vec{\alpha}_{ij} = -(\det R) R_{ik} R_{jl} \vec{\alpha}_{kl}$$

to account for

$$H \xrightarrow{T} -H, P \xrightarrow{T} P.$$

Therefore, for a magnetic point group of  $m'mm$ , we enforce invariance under each of three symmetry operations:  $m'_x$ ,  $m_y$ ,  $m_z$ , with  $R_x = \text{diag}(-1, 1, 1)$ ,  $R_y = \text{diag}(1, -1, 1)$  and  $R_z = \text{diag}(1, 1, -1)$ , respectively. Thus, the only nonzero components are  $\alpha_{yz}$  and  $\alpha_{zy}$ .

Therefore, its magnetoelectric susceptibility tensor  $\vec{\alpha}$  has the form of:

$$\vec{\alpha} = \begin{pmatrix} 0 & 0 & 0 \\ 0 & 0 & \alpha_{bc} \\ 0 & \alpha_{cb} & 0 \end{pmatrix}.$$

**Note 2: Functional forms for ED SHG for point group  $m'mm$ ,  $22'2'$ ,  $m'2'm$  and  $m2m$**

The c-type ED SHG nonlinear optical susceptibility tensors for  $m'mm$ ,  $22'2'$ , and  $m'2'm$  are the same. They are polar and of rank-3:

$$\chi_{m'mm/22'2'/m'2'm}^{ED,(c)}(2\omega) = \begin{pmatrix} \begin{pmatrix} \chi^{xxx} \\ 0 \\ 0 \end{pmatrix} & \begin{pmatrix} 0 \\ \chi^{xyy} \\ 0 \end{pmatrix} & \begin{pmatrix} 0 \\ 0 \\ \chi^{xzz} \end{pmatrix} \\ \begin{pmatrix} 0 \\ \chi^{yxy} \\ 0 \end{pmatrix} & \begin{pmatrix} \chi^{yxy} \\ 0 \\ 0 \end{pmatrix} & \begin{pmatrix} 0 \\ 0 \\ 0 \end{pmatrix} \\ \begin{pmatrix} 0 \\ 0 \\ \chi^{zzz} \end{pmatrix} & \begin{pmatrix} 0 \\ 0 \\ 0 \end{pmatrix} & \begin{pmatrix} \chi^{zzz} \\ 0 \\ 0 \end{pmatrix} \end{pmatrix}$$

In case of normal incidence, the resulted functional forms for RA-SHG in the parallel and the crossed channels are:

$$I_{parallel}^{ED,(c)}(2\omega) \propto ((\chi^{xyy} + 2\chi^{yxy})\cos(\phi)^2\sin(\phi) + \chi^{xxx}\sin(\phi)^3)^2$$

$$I_{crossed}^{ED,(c)}(2\omega) \propto (\chi^{xyy}\cos(\phi)^3 + (\chi^{xxx} - 2\chi^{yxy})\cos(\phi)\sin(\phi)^2)^2$$

The  $m2m$  supports  $i$ -type ED SHG radiation with the corresponding susceptibility tensor,

$$\chi_{m2m}^{ED,(i)}(2\omega) = \begin{pmatrix} \begin{pmatrix} 0 \\ \chi^{xxy} \\ 0 \end{pmatrix} & \begin{pmatrix} \chi^{xxy} \\ 0 \\ 0 \end{pmatrix} & \begin{pmatrix} 0 \\ 0 \\ 0 \end{pmatrix} \\ \begin{pmatrix} \chi^{yxx} \\ 0 \\ 0 \end{pmatrix} & \begin{pmatrix} 0 \\ \chi^{yyy} \\ 0 \end{pmatrix} & \begin{pmatrix} 0 \\ 0 \\ \chi^{yzz} \end{pmatrix} \\ \begin{pmatrix} 0 \\ 0 \\ 0 \end{pmatrix} & \begin{pmatrix} 0 \\ 0 \\ \chi^{zyz} \end{pmatrix} & \begin{pmatrix} 0 \\ \chi^{zyz} \\ 0 \end{pmatrix} \end{pmatrix}$$

Under normal incidence, the resulting functional forms for RA-SHG in the parallel and the crossed channels are:

$$I_{parallel}^{ED,(i)}(2\omega) \propto (\chi^{yyy}\cos(\phi)^3 + (\chi^{yxx} + 2\chi^{xxy})\cos(\phi)\sin(\phi)^2)^2$$

$$I_{crossed}^{ED,(i)}(2\omega) \propto ((2\chi^{xxy} - 2\chi^{yyy})\cos(\phi)^2\sin(\phi) - \chi^{yxx}\sin(\phi)^3)^2$$

Note that the c-type and the  $i$ -type have the complementary nonzero tensor elements, corresponding to orthogonal polarization components rotated by  $90^\circ$ . Therefore, the interference between c-type and  $i$ -type contributions is straightforward, as their polarization components add vectorially in orthogonal bases:

$$\begin{aligned}
I_{parallel}^{ED,interfered}(2\omega) &\propto ((\chi^{xyy} + 2\chi^{yxy})\cos(\phi)^2\sin(\phi) + \chi^{xxx}\sin(\phi)^3 \\
&\quad + \chi^{yyy}\cos(\phi)^3 + (\chi^{yxx} + 2\chi^{xxy})\cos(\phi)\sin(\phi)^2)^2 \\
I_{crossed}^{ED,interfered}(2\omega) &\propto (\chi^{xyy}\cos(\phi)^3 + (\chi^{xxx} - 2\chi^{yxy})\cos(\phi)\sin(\phi)^2 \\
&\quad + (2\chi^{xxy} - 2\chi^{yyy})\cos(\phi)^2\sin(\phi) - \chi^{yxx}\sin(\phi)^3)^2
\end{aligned}$$

### Note 3: Group theory analysis of spin terms

Consider the spins in the two layers:  $\vec{S}_1 = (S_{1x}, S_{1y}, S_{1z})$  and  $\vec{S}_2 = (S_{2x}, S_{2y}, S_{2z})$ , where the number in the subscript denotes the top layer (1) and bottom layer (2), and the letter in the subscript denotes the corresponding component in the Cartesian coordinate. The linear combination of the linear spin terms and their corresponding irreducible representation (irrep) of the  $mmm$  are tabulated in Table S1. The table is built by constructing linear combinations of the spin terms and examine their transformations under each symmetry operations in the point group  $mmm$  to fill in the characters. By comparing the filled characters with the character table, we are able to determine the irrep, the basis and the corresponding magnetic point group of each linear combination. Each linear combination of the linear terms corresponds to a spin configuration shown in the table.

**Table S1. Character table for linear spin combinations**

| Linear spin       | Irrep    | Basis | Subgroup | $m_x$ | $m_y$ | $m_z$ | $2_x$ | $2_y$ | $2_z$ | $i$ | Spin config |
|-------------------|----------|-------|----------|-------|-------|-------|-------|-------|-------|-----|-------------|
| $S_{1x} + S_{2x}$ | $B_{3g}$ | $R_x$ | $mm'm'$  | 1     | -1    | -1    | 1     | -1    | -1    | 1   | FM along a  |
| $S_{1y} + S_{2y}$ | $B_{2g}$ | $R_x$ | $m'mm'$  | -1    | 1     | -1    | -1    | 1     | -1    | 1   | FM along b  |
| $S_{1z} + S_{2z}$ | $B_{1g}$ | $R_x$ | $m'm'm$  | -1    | -1    | 1     | -1    | -1    | 1     | 1   | FM along c  |
| $S_{1x} - S_{2x}$ | $B_{2u}$ | y     | $mm'm$   | 1     | -1    | 1     | -1    | 1     | -1    | -1  | AFM along a |
| $S_{1y} - S_{2y}$ | $B_{3u}$ | x     | $m'mm$   | -1    | 1     | 1     | 1     | -1    | -1    | -1  | AFM along b |
| $S_{1z} - S_{2z}$ | $A_u$    | xyz   | $m'm'm'$ | -1    | -1    | -1    | 1     | 1     | 1     | -1  | AFM along c |

Next, to identify all the possible bilinear terms, we considered the out product of the two spins,

$$S_1 \otimes S_2 = \begin{pmatrix} S_{1x}S_{2x} & S_{1x}S_{2y} & S_{1x}S_{2z} \\ S_{1y}S_{2x} & S_{1y}S_{2y} & S_{1y}S_{2z} \\ S_{1z}S_{2x} & S_{1z}S_{2y} & S_{1z}S_{2z} \end{pmatrix}$$

By projecting the linear combinations of the bilinear terms into the irrep of  $mmm$ , we constructed Table S2.

**Table S2. Character table for bilinear spin combinations**

| Linear spin                                | Irrep    | Basis           | Subgroup | $m_x$ | $m_y$ | $m_z$ | $2_x$ | $2_y$ | $2_z$ | $i$ |
|--------------------------------------------|----------|-----------------|----------|-------|-------|-------|-------|-------|-------|-----|
| $S_{1y}S_{2z} + S_{1z}S_{2y}$              | $B_{3g}$ | $R_x$           | $2/m$    | 1     | -1    | -1    | 1     | -1    | -1    | 1   |
| $S_{1x}S_{2z} + S_{1z}S_{2x}$              | $B_{2g}$ | $R_x$           | $2/m$    | -1    | 1     | -1    | -1    | 1     | -1    | 1   |
| $S_{1x}S_{2y} + S_{1y}S_{2x}$              | $B_{1g}$ | $R_x$           | $2/m$    | -1    | -1    | 1     | -1    | -1    | 1     | 1   |
| $S_{1y}S_{2z} - S_{1z}S_{2y}$              | $B_{2u}$ | y               | $m2m$    | 1     | -1    | 1     | -1    | 1     | -1    | -1  |
| $S_{1x}S_{2z} - S_{1z}S_{2x}$              | $B_{3u}$ | x               | $2mm$    | -1    | 1     | 1     | 1     | -1    | -1    | -1  |
| $S_{1x}S_{2y} - S_{1y}S_{2x}$              | $A_u$    | xyz             | $222$    | -1    | -1    | -1    | 1     | 1     | 1     | -1  |
| $S_{1x}S_{2x}, S_{1y}S_{2y}, S_{1z}S_{2z}$ | $E$      | $x^2, y^2, z^2$ | $mmm$    | 1     | 1     | 1     | 1     | 1     | 1     | 1   |

**Note 4: Magnetic field dependence of all tensor elements for B//c case**

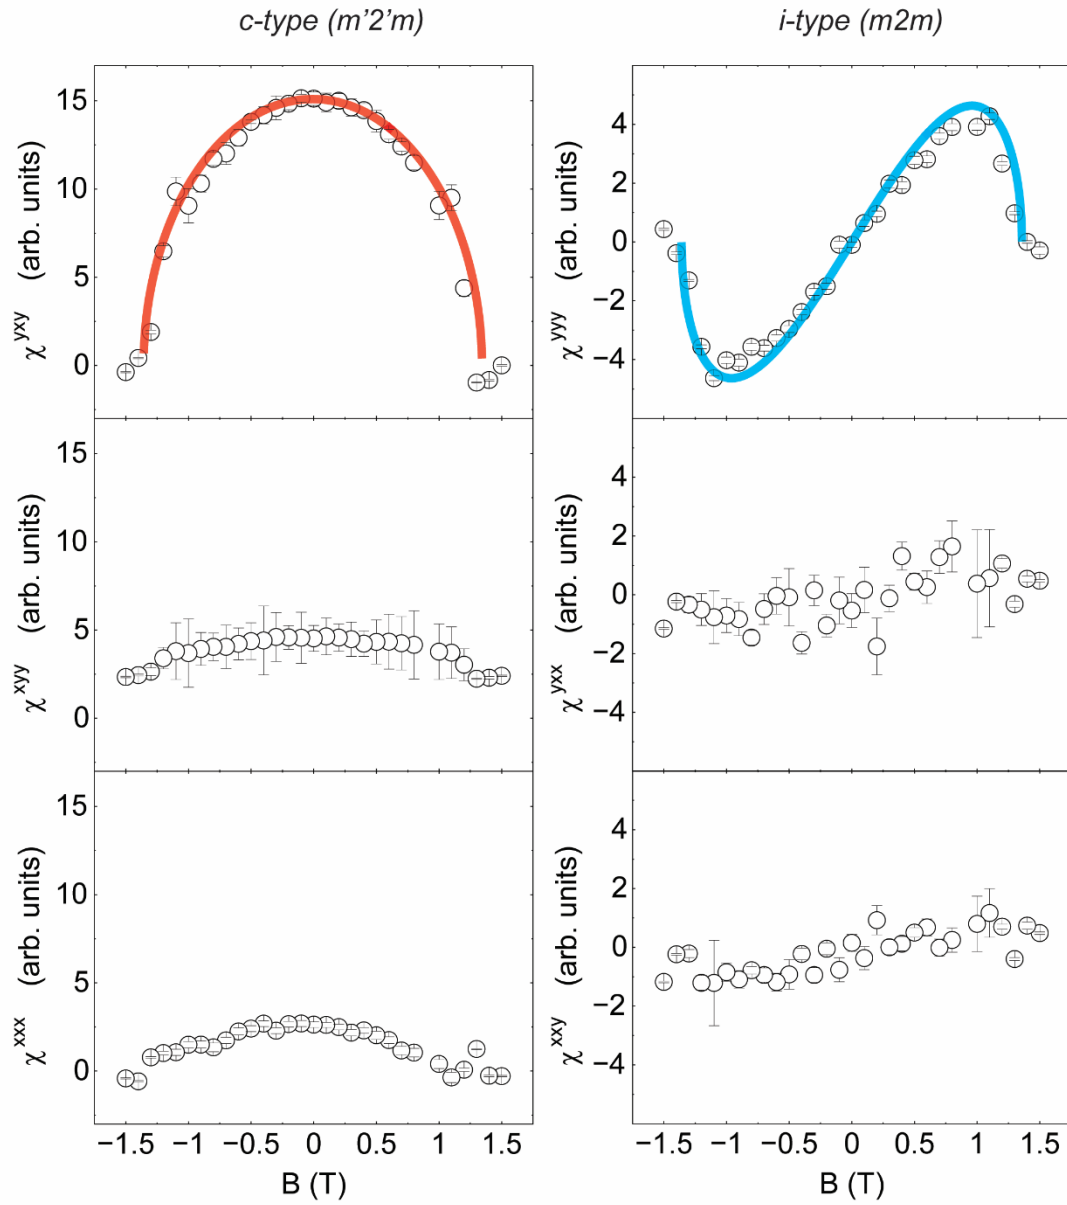

**Fig. S1** Fitted tensor elements vs magnetic field. The left column are three tensor elements corresponding to the c-type SHG contribution and the right column are three tensor elements corresponding to the i-type SHG contribution.

**Note 5: Fitting model for field-dependence of nonlinear susceptibility tensor elements**

To comprehend these two trends, we build the following fitting model. By defining the angle between  $\vec{S}_1$  and  $\vec{S}_2$  to be  $\theta$ , we have  $\vec{M} = 2S \cos \frac{\theta}{2} \hat{c}$ ,  $\vec{N} = 2S \sin \frac{\theta}{2} \hat{b}$ , and  $\vec{P} \propto S^2 \sin \theta$ , where  $S$  represents the magnetic moment magnitude. Knowing that the out-of-plane net magnetization scale linearly with the  $c$ -axis  $B$  field, i.e.,  $M = \gamma B$ , and that the fully polarized FM magnetic state is achieved at  $B_c$  with a net magnetization of  $2S$ , i.e.,  $2S = \gamma B_c$ , we arrive at  $\cos \frac{\theta}{2} = \frac{B}{B_c}$ , and thereby,  $\vec{N} = 2S \sqrt{1 - \left(\frac{B}{B_c}\right)^2}$  and  $\vec{P} \propto \cos \left(\frac{\theta}{2}\right) \sin \left(\frac{\theta}{2}\right) = \frac{B}{B_c} \sqrt{1 - \left(\frac{B}{B_c}\right)^2}$
